# Supplementary material for: A novel long noncoding RNA PILRLS promote proliferation through TCL1A by activing MDM2 in Retroperitoneal liposarcoma
Source: PubMed Central journal article supplement (PMC5355154; doi:10.18632/oncotarget.14814), 2017-01-25
Supplement: oncotarget-08-13971-s001.pdf [file oncotarget-08-13971-s001.pdf]

# A novel long noncoding RNA PILRLS promote proliferation through TCL1A by activating MDM2 in Retroperitoneal liposarcoma

## Supplementary Materials

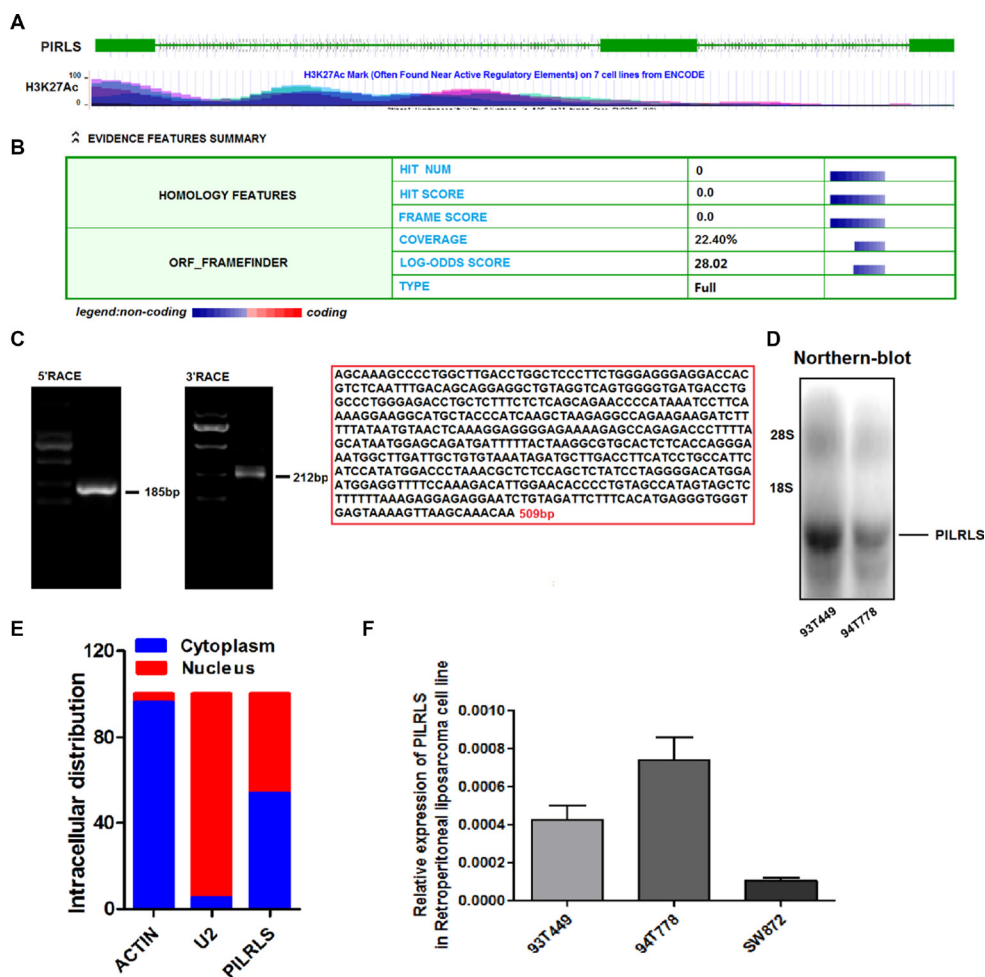

**Supplementary Figure 1: Basic characteristic of PILRLS in RLS cells.** (A) PILRLS located in chr5 with only one transcript. (B) Using CPC (Coding Potential Calculator) software to predicted the protein-coding ability. (C) Representative image of PCR products from the 3' and 5' RACE and the sequence of PCR products. (D) Northern-blot verified the full-length of PILRLS. (E) Expression level of PILRLS in cytoplasmic and nuclear extract of RLS cells. U2 as the internal control of nuclear, ACTIN as the internal control of cytoplasmic. (F) The expression level of PILRLS in three RLS cell lines.
